# Supplementary material
Source: Springer Nature journal article supplement (https://www.springermedizin.de/resource/supplementary/12960_2011_298_MOESM4_ESM.pdf/9569814)

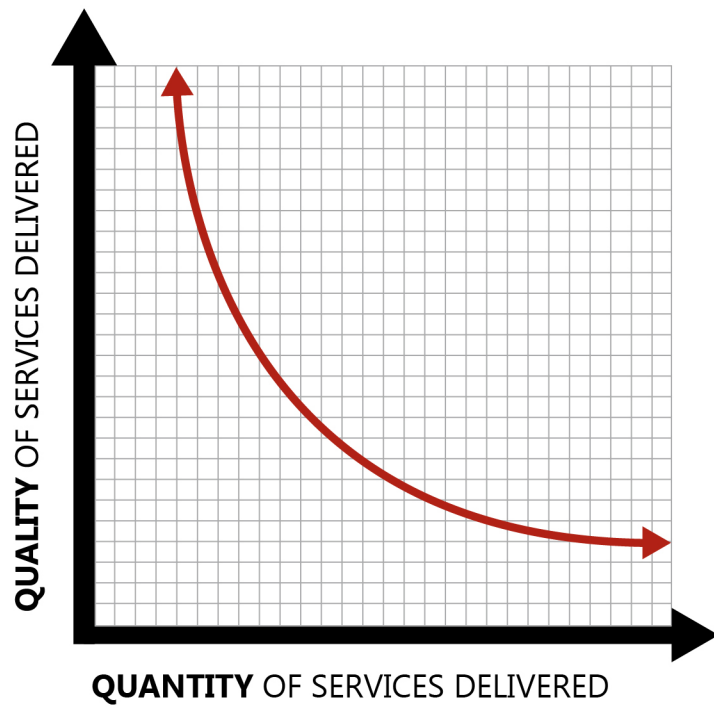

Supplement: MOESM4 [file 9569814]
